# Supplementary material for: The Clinical Feature and Treatment Outcome of Ocular Melanoma: A 34-Year Experience in a Tertiary Referral Center
Source: MDPI journal article supplement (doi:10.3390/cancers13235926), 2021-11-25
Supplement: s1 [file s1]

# Supplementary

**Table S1:** Age and gender distribution in the subgroups with melanoma of specific origins.

| Tumor Origin        | n  | Mean Age, years (range) | <i>p</i> value |
|---------------------|----|-------------------------|----------------|
| <b>Total</b>        |    |                         |                |
| M                   | 47 | 60.6 ± 15.9 (31–87)     | 0.006          |
| F                   | 41 | 50.4 ± 17.9 (12–84)     |                |
| <b>Uvea</b>         |    |                         |                |
| M                   | 26 | 51.7 ± 11.1 (35–72)     | 0.340          |
| F                   | 29 | 48.2 ± 15.8 (22–84)     |                |
| <b>Eyelid</b>       |    |                         |                |
| M                   | 4  | 77.3 ± 6.8 (68–84)      | 0.540          |
| F                   | 2  | 51.0 ± 42.4 (21–81)     |                |
| <b>Conjunctiva</b>  |    |                         |                |
| M                   | 11 | 64.1 ± 15.6 (31–81)     | 0.280          |
| F                   | 7  | 53.3 ± 22.1 (12–76)     |                |
| <b>Lacrimal sac</b> |    |                         |                |
| M                   | 0  | N/A                     | N/A*           |
| F                   | 1  | 57.0 (57)               |                |
| <b>Orbit</b>        |    |                         |                |
| M                   | 6  | 81.5 ± 4.1 (77–87)      | 0.430          |
| F                   | 2  | 68.5 ± 14.8 (58–79)     |                |

\*: N/A indicates that the data was not available or the study did not assess for the gene of interest.
